# Supplementary material for: Magnitude and Spread of Bed Bugs (Cimex lectularius) throughout Ohio (USA) Revealed by Surveys of Pest Management Industry
Source: MDPI journal article supplement (doi:10.3390/insects12020133), 2021-02-04
Supplement: s1 [file s1]

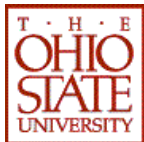

## 2016 Ohio Statewide Bed Bug Survey

*Dear Colleague:*

*Like many states, Ohio has been considerably impacted by bed bugs, but the extent of the bed bug issue has not been adequately documented or tracked throughout the state. This Ohio Statewide Bed Bug Survey is a research project for gathering such data.*

*This survey is being disseminated only to pest management companies/individuals who are licensed (category 10A) to treat for bed bugs in the state of Ohio. (Because of the type of data to be collected, we ask that only pest management professionals complete the survey.) Your participation is voluntary. Furthermore, participants can skip any questions they wish not to answer.*

*Even if you don't do bed bug work, we need to know this! If you don't do bed bug work, then only the first four brief survey items pertain to you.*

*To ensure that your data remain anonymous, any identifiers such as your name, address, email will be stripped from the survey tallies. De-identified data will be maintained for a period of at least 5 years after study completion per the Ohio State Research Data policy.*

*At the conclusion of the survey, we would like to publicly acknowledge the participants. There are two options if you wish to be acknowledged: you can provide your name, company, and email (survey items 30-32, which are on a separate page), or you can skip items 30-32 and contact me at [jones.1800@osu.edu](mailto:jones.1800@osu.edu) to let me know that you completed the survey.*

*For questions about your rights as a participant in this study or to discuss other study-related concerns or complaints with someone who is not part of the research team, you may contact Ms. Sandra Meadows in the Office of Responsible Research Practices at 1-800-678-6251 or [hsconcerns@osu.edu](mailto:hsconcerns@osu.edu).*

*Plans are to share the survey results at future meetings and in a journal or trade magazine. Pertinent data summaries will be shared with EPA and HUD in an effort to increase federal recognition of the bed bug problem.*

*We ask for your immediate assistance in completing the following survey. **Your feedback is requested no later than Tuesday, March 21, 2017.***

*THANK YOU for your help with this important endeavor. Your support is very much appreciated.*

*Dr. Susan C. Jones*

*Urban Entomologist &  
State Extension Specialist on Household and Structural Insects*

*Note: Funding for the Ohio Statewide Bed Bug Survey has been provided by a grant to OSU Extension Entomology from the USDA National Institute of Food and Agriculture, Extension IPM Program.*

Additional Instructions: If your company has more than one branch office, please answer the survey questions only for the branch at which you are located or with the help of regional/district/other branch managers; please fill out a separate survey for each location.

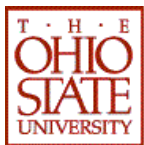

## Ohio Statewide Bed Bug Survey

1. In which Ohio county is your business located? If your company has more than one branch, please answer only for the branch at which you are located. If you are located out-of-state, please circle 89-Out-of-State. (please circle ONE ONLY)

|               |              |              |               |             |                 |
|---------------|--------------|--------------|---------------|-------------|-----------------|
| 1-Adams       | 16-Coshocton | 31-Hamilton  | 46-Logan      | 61-Noble    | 76-Stark        |
| 2-Allen       | 17-Crawford  | 32-Hancock   | 47-Lorain     | 62-Ottawa   | 77-Summit       |
| 3-Ashland     | 18-Cuyahoga  | 33-Hardin    | 48-Lucas      | 63-Paulding | 78-Trumbull     |
| 4-Ashtabula   | 19-Darke     | 34-Harrison  | 49-Madison    | 64-Perry    | 79-Tuscarawas   |
| 5-Athens      | 20-Defiance  | 35-Henry     | 50-Mahoning   | 65-Pickaway | 80-Union        |
| 6-Auglaize    | 21-Delaware  | 36-Highland  | 51-Marion     | 66-Pike     | 81-Van Wert     |
| 7-Belmont     | 22-Erie      | 37-Hocking   | 52-Medina     | 67-Portage  | 82-Vinton       |
| 8-Brown       | 23-Fairfield | 38-Holmes    | 53-Meigs      | 68-Preble   | 83-Warren       |
| 9-Butler      | 24-Fayette   | 39-Huron     | 54-Mercer     | 69-Putnam   | 84-Washington   |
| 10-Carroll    | 25-Franklin  | 40-Jackson   | 55-Miami      | 70-Richland | 85-Wayne        |
| 11-Champaign  | 26-Fulton    | 41-Jefferson | 56-Monroe     | 71-Ross     | 86-Williams     |
| 12-Clark      | 27-Gallia    | 42-Knox      | 57-Montgomery | 72-Sandusky | 87-Wood         |
| 13-Clermont   | 28-Geauga    | 43-Lake      | 58-Morgan     | 73-Scioto   | 88-Wyandot      |
| 14-Clinton    | 29-Greene    | 44-Lawrence  | 59-Morrow     | 74-Seneca   | 89-Out-of-State |
| 15-Columbiana | 30-Guernsey  | 45-Licking   | 60-Muskingum  | 75-Shelby   |                 |

2. What year was your company (branch office) established/licensed in Ohio? (please enter 4-digit year)

3. How many employees does your company (branch office) currently have? (please enter number)

4. Do you provide treatment services for bed bugs in Ohio? (please circle)

Yes

No (If No, thank you! You have finished the 2017 survey.)

5. In which Ohio counties do you perform bed bug work? *(Please circle each that is applicable.)*  
Please indicate the approximate percentage of your bed bug work that is done in each county that you selected; you should insert the percentage in the box located after each selected county. *(Please note that all the percentages in the table must sum to 100%.)*

|               |  |              |  |              |  |               |  |                 |  |
|---------------|--|--------------|--|--------------|--|---------------|--|-----------------|--|
| 1-Adams       |  | 19-Darke     |  | 37-Hocking   |  | 55-Miami      |  | 73-Scioto       |  |
| 2-Allen       |  | 20-Defiance  |  | 38-Holmes    |  | 56-Monroe     |  | 74-Seneca       |  |
| 3-Ashland     |  | 21-Delaware  |  | 39-Huron     |  | 57-Montgomery |  | 75-Shelby       |  |
| 4-Ashtabula   |  | 22-Erie      |  | 40-Jackson   |  | 58-Morgan     |  | 76-Stark        |  |
| 5-Athens      |  | 23-Fairfield |  | 41-Jefferson |  | 59-Morrow     |  | 77-Summit       |  |
| 6-Auglaize    |  | 24-Fayette   |  | 42-Knox      |  | 60-Muskingum  |  | 78-Trumbull     |  |
| 7-Belmont     |  | 25-Franklin  |  | 43-Lake      |  | 61-Noble      |  | 79-Tuscarawas   |  |
| 8-Brown       |  | 26-Fulton    |  | 44-Lawrence  |  | 62-Ottawa     |  | 80-Union        |  |
| 9-Butler      |  | 27-Gallia    |  | 45-Licking   |  | 63-Paulding   |  | 81-Van Wert     |  |
| 10-Carroll    |  | 28-Geauga    |  | 46-Logan     |  | 64-Perry      |  | 82-Vinton       |  |
| 11-Champaign  |  | 29-Greene    |  | 47-Lorain    |  | 65-Pickaway   |  | 83-Warren       |  |
| 12-Clark      |  | 30-Guernsey  |  | 48-Lucas     |  | 66-Pike       |  | 84-Washington   |  |
| 13-Clermont   |  | 31-Hamilton  |  | 49-Madison   |  | 67-Portage    |  | 85-Wayne        |  |
| 14-Clinton    |  | 32-Hancock   |  | 50-Mahoning  |  | 68-Preble     |  | 86-Williams     |  |
| 15-Columbiana |  | 33-Hardin    |  | 51-Marion    |  | 69-Putnam     |  | 87-Wood         |  |
| 16-Coshocton  |  | 34-Harrison  |  | 52-Medina    |  | 70-Richland   |  | 88-Wyandot      |  |
| 17-Crawford   |  | 35-Henry     |  | 53-Meigs     |  | 71-Ross       |  | 89-Out-of-State |  |
| 18-Cuyahoga   |  | 36-Highland  |  | 54-Mercer    |  | 72-Sandusky   |  |                 |  |

6. In which of the following sites does your company (branch) treat for bed bugs, and approximately what percentage of your overall bed bug work is done in each? *(Please note that percentages must sum to 100%.)*

| Site                                        | % | Site                                    | % |
|---------------------------------------------|---|-----------------------------------------|---|
| Hotels/motels                               |   | College dormitories                     |   |
| Apartments/condos--government subsidized    |   | Hospitals/outpatient facilities         |   |
| Apartment/condos--non-government subsidized |   | Doctor's offices                        |   |
| Single family homes                         |   | Commercial/office buildings             |   |
| Nursing homes                               |   | Vehicles (train/bus/taxi/airplane/etc.) |   |
| Schools/day care centers                    |   | Other <i>(please specify)</i> _____     |   |

7. Do you have call tracking (software)? (please circle one)      Yes      No

8. How many total calls did you receive regarding treatment for bed bugs during each of the following years (2010-2016)? Note, if you do not have call tracking, please estimate the number of calls. (Please check one category for each year.)

| # Calls<br>Year | 0                        | 1-10                     | 11-50                    | 51-100                   | 101-500                  | 501-1000                 | 1001-2000                | 2001-3000                | 3001-4000                | 4001-5000                | >5000                    | Don't Know               |
|-----------------|--------------------------|--------------------------|--------------------------|--------------------------|--------------------------|--------------------------|--------------------------|--------------------------|--------------------------|--------------------------|--------------------------|--------------------------|
| 2010            | <input type="checkbox"/> |
| 2011            | <input type="checkbox"/> |
| 2012            | <input type="checkbox"/> |
| 2013            | <input type="checkbox"/> |
| 2014            | <input type="checkbox"/> |
| 2015            | <input type="checkbox"/> |
| 2016            | <input type="checkbox"/> |

**\*Instructions\***

Please answer all of the remaining questions based on your company's experience treating bed bugs between 2010 and 2016. For any questions that involve a written response, **PLEASE PRINT CLEARLY.**

9. Approximately what percentage of your customers that request bed bug work actually have a pest other than bed bugs (misdiagnosed by customers)?  %  
(Please round to nearest whole percent.)

10. In the table below, please check the box next to all of the insects or things that your customers have misdiagnosed as bed bugs. Then rank all items that you check, starting with 1 being "most frequently misdiagnosed as bed bugs," 2 being "2<sup>nd</sup> most frequently misdiagnosed as bed bugs," etc.

| Choices                                         | Customers have misdiagnosed as bed bugs?<br>(Check box if yes.) | Rank<br>(Only rank checked items.) |
|-------------------------------------------------|-----------------------------------------------------------------|------------------------------------|
| Carpet beetles (adults, larvae, or shed skins)  | <input type="checkbox"/>                                        |                                    |
| Cockroaches                                     | <input type="checkbox"/>                                        |                                    |
| Stink bugs                                      | <input type="checkbox"/>                                        |                                    |
| Stored product beetles                          | <input type="checkbox"/>                                        |                                    |
| Bat bugs                                        | <input type="checkbox"/>                                        |                                    |
| Non-insect (skin scrapings, lint, debris, etc.) | <input type="checkbox"/>                                        |                                    |
| Other<br>(please specify): _____                | <input type="checkbox"/>                                        |                                    |

**11. In your estimation, what percentage of your customers have attempted do-it-yourself (DIY) treatment(s) for bed bugs? (Please circle one choice from each row.)**

|                                                                  |    |       |        |        |        |      |
|------------------------------------------------------------------|----|-------|--------|--------|--------|------|
| <b>Before hiring you</b>                                         | 0% | 1-10% | 11-25% | 26-50% | 51-75% | >75% |
| <b>While you are still conducting the customer's bed bug job</b> | 0% | 1-10% | 11-25% | 26-50% | 51-75% | >75% |

**12. If you answered a percentage greater than 0% above for either row, please answer parts (a), (b), and (c) below:**

**a) How much do you estimate that each of your customers spends, on average per year, for DIY bed bug products/treatments? (Please round to the nearest dollar.)** \$

**b) What percent of your customers (who attempt to use DIY products) solve their bed bug infestation using DIY products? (Please round to nearest whole percent.)**  %

**c) If your answer to (b) was greater than 0%, please briefly explain the circumstances of the infestation and the time period that it took to achieve bed bug control.**

---



---

**13. In your estimation, what percentage of your customers have misused products in an attempt to kill bed bugs? (Please circle one.)**

0%      1-10%      11-25%      26-50%      51-75%      >75%      Don't Know

**14. If you are aware of customers misusing products for bed bugs, what products have customers misused?**

| <b>Choices</b>                                                                                                                                               | <b>Customers have misused against bed bugs?(Check box if yes.)</b> |
|--------------------------------------------------------------------------------------------------------------------------------------------------------------|--------------------------------------------------------------------|
| Alcohol (isopropyl, rubbing, etc.)                                                                                                                           | <input type="checkbox"/>                                           |
| Home cleaner/disinfectant (bleach, laundry detergent, etc.)                                                                                                  | <input type="checkbox"/>                                           |
| Petroleum product (gas, oil, etc.)                                                                                                                           | <input type="checkbox"/>                                           |
| Over-the-counter aerosol or liquid                                                                                                                           | <input type="checkbox"/>                                           |
| Over-the-counter fogger ('bug bomb')                                                                                                                         | <input type="checkbox"/>                                           |
| Natural product spray or liquid (botanical, 'green', 12b [non-EPA registered])                                                                               | <input type="checkbox"/>                                           |
| Dust/powder pesticide (other than garden dusts) (please list specific products)                                                                              | <input type="checkbox"/>                                           |
| Professional pesticide liquid or spray other than garden products (EPA registered; typically not available at retail stores) (please list specific products) | <input type="checkbox"/>                                           |
| Outdoor/garden pesticide (spray or dust) (please list specific products)                                                                                     | <input type="checkbox"/>                                           |
| Illegal/unregistered pesticide                                                                                                                               | <input type="checkbox"/>                                           |
| Other (please specify): _____                                                                                                                                | <input type="checkbox"/>                                           |

15. What percentage of your customers have disposed of their furniture in their efforts to control bed bugs? *(please circle one)*

0%                      1-10%                      11-25%                      26-50%                      51-75%                      >75%                      Don't Know

16. If you answered a percentage greater than 0% above, to what extent are your customers using the following procedures to dispose of bed bug-infested furniture? *(please check one per row)*

|                                                                                      | Never                    | Rarely                   | Sometimes                | Often                    | Always                   | Don't Know               |
|--------------------------------------------------------------------------------------|--------------------------|--------------------------|--------------------------|--------------------------|--------------------------|--------------------------|
| Items are wrapped prior to disposal                                                  | <input type="checkbox"/> |
| Items are treated prior to disposal                                                  | <input type="checkbox"/> |
| Prior to disposal, items are ripped, damaged, or otherwise defaced to prevent re-use | <input type="checkbox"/> |
| Items are placed for normal trash pick-up                                            | <input type="checkbox"/> |
| Items are taken to the dump by the customer or their designee                        | <input type="checkbox"/> |
| Items are given away or sold to someone else                                         | <input type="checkbox"/> |

17. To what extent is your company using the following methods/devices to detect bed bugs? *(please check one per row)*

|                                                                                                                                               | Never                    | Rarely                   | Sometimes                | Often                    | Always                   |
|-----------------------------------------------------------------------------------------------------------------------------------------------|--------------------------|--------------------------|--------------------------|--------------------------|--------------------------|
| Visual inspection                                                                                                                             | <input type="checkbox"/> |
| Active monitoring devices (monitors/traps using heat, carbon dioxide [CO <sub>2</sub> ], chemical lure – either singly or in any combination) | <input type="checkbox"/> |
| Glueboards or sticky traps                                                                                                                    | <input type="checkbox"/> |
| Pitfall traps (typically placed underneath each bed leg)                                                                                      | <input type="checkbox"/> |
| Canine (dog)-handler team(s)                                                                                                                  | <input type="checkbox"/> |

**18. How many treatments for bed bugs (individual residence, individual unit or apartment treated within an apartment building, company office treated within a larger building, hotel room, etc.) did your company (branch office) conduct during each of the following years (2010-2016)? Note, if you do not have exact numbers, please estimate the number of treatments. (Please check only one box for each year.)**

| # Calls<br>Year | 0                        | 1-10                     | 11-50                    | 51-100                   | 101-500                  | 501-1000                 | 1001-2000                | 2001-3000                | >3000                    | Don't Know               | Did not provide treatments |
|-----------------|--------------------------|--------------------------|--------------------------|--------------------------|--------------------------|--------------------------|--------------------------|--------------------------|--------------------------|--------------------------|----------------------------|
| 2010            | <input type="checkbox"/>   |
| 2011            | <input type="checkbox"/>   |
| 2012            | <input type="checkbox"/>   |
| 2013            | <input type="checkbox"/>   |
| 2014            | <input type="checkbox"/>   |
| 2015            | <input type="checkbox"/>   |
| 2016            | <input type="checkbox"/>   |

**19. On average, how many total visits per infestation are needed for your company to achieve bed bug control? (Please circle one)**

0                      1                      2                      3                      4                      5                      >5

**20. What type of treatments/products do you typically use to control bed bugs? (Check all that apply)**

- |                                                                |                                                                           |                                                                                                          |
|----------------------------------------------------------------|---------------------------------------------------------------------------|----------------------------------------------------------------------------------------------------------|
| <input type="checkbox"/> 1-Insecticide/Chemical sprays         | <input type="checkbox"/> 7-Structural fumigation (sulfuryl fluoride)      | <input type="checkbox"/> 13-Laundering of infested items by customer (using washer +/- or clothes drier) |
| <input type="checkbox"/> 2-Insecticide/Chemical dusts          | <input type="checkbox"/> 8-Vacuum (other than that performed by customer) | <input type="checkbox"/> 14-Insecticide-impregnated liners for mattress/box springs                      |
| <input type="checkbox"/> 3-Whole room/structure heat treatment | <input type="checkbox"/> 9-Vacuumping performed by customer               | <input type="checkbox"/> 15-Container fumigation (sulfuryl fluoride)                                     |
| <input type="checkbox"/> 4-Container heat treatment            | <input type="checkbox"/> 10-Disposal of infested items                    | <input type="checkbox"/> 16-Other (please specify) _____                                                 |
| <input type="checkbox"/> 5-Steam                               | <input type="checkbox"/> 11-Mattress/box springs encasements              | _____                                                                                                    |
| <input type="checkbox"/> 6-Spot-freezing equipment             | <input type="checkbox"/> 12-Infested items placed inside freezer          | _____                                                                                                    |



**21. a) If you checked "insecticide/chemical sprays" above in question 20, what spray treatments/products do you usually use to treat for bed bugs?**

- |                                        |                                    |                                                          |
|----------------------------------------|------------------------------------|----------------------------------------------------------|
| <input type="checkbox"/> Bedlam        | <input type="checkbox"/> Permanone | <input type="checkbox"/> Tandem                          |
| <input type="checkbox"/> Bedlam Plus   | <input type="checkbox"/> Phantom   | <input type="checkbox"/> Tempo Insecticide               |
| <input type="checkbox"/> Cy-Kick       | <input type="checkbox"/> Prelude   | <input type="checkbox"/> Temprid                         |
| <input type="checkbox"/> Demand        | <input type="checkbox"/> Prentox   | <input type="checkbox"/> Transport                       |
| <input type="checkbox"/> Dragnet       | <input type="checkbox"/> Saga      | <input type="checkbox"/> Zenprox                         |
| <input type="checkbox"/> Esfenvalerate | <input type="checkbox"/> Steri-Fab | <input type="checkbox"/> CrossFire                       |
| <input type="checkbox"/> Gentrol       | <input type="checkbox"/> Suspend   | <input type="checkbox"/> Other ( <i>please specify</i> ) |
| <input type="checkbox"/> Kicker        | <input type="checkbox"/> Talstar   | _____                                                    |
| <input type="checkbox"/> Onslaught     |                                    |                                                          |

**b) If you selected "CrossFire" above in question 21a, please answer the following question: Since this is a newly marketed product, estimate the percentage of jobs in which you have used CrossFire.**

%

**c) If you checked "insecticide/chemical dusts" above in question 20, what dust treatments/products do you usually use to treat for bed bugs?**

- |                                     |                                      |                                                          |
|-------------------------------------|--------------------------------------|----------------------------------------------------------|
| <input type="checkbox"/> Alpine D   | <input type="checkbox"/> Drione      | <input type="checkbox"/> Tempo D                         |
| <input type="checkbox"/> CimeXa     | <input type="checkbox"/> EcoPCO D/X  | <input type="checkbox"/> Tri-Die                         |
| <input type="checkbox"/> Cynoff D   | <input type="checkbox"/> Perma-Dust  | <input type="checkbox"/> Other ( <i>please specify</i> ) |
| <input type="checkbox"/> Delta Dust | <input type="checkbox"/> Perma-Guard | _____                                                    |

**22. How would you rate your level of satisfaction with the currently available chemical treatment options for bed bugs? (*please circle one*)**

1 -Very Dissatisfied    2 - Dissatisfied    3 - Neither Dissatisfied nor Satisfied    4 - Satisfied    5 - Very Satisfied

**Please provide comments as to why you are satisfied or dissatisfied with the currently available chemical treatment options.**

23. How would you rate your level of satisfaction with the currently available non-chemical treatment options for bed bugs? *(please circle one)*

1 -Very Dissatisfied

2 - Dissatisfied

3 - Neither Dissatisfied nor  
Satisfied

4 - Satisfied

5 - Very  
Satisfied

Please provide comments as to why you are satisfied or dissatisfied with the currently available non-chemical treatment options.

24. Currently, what percentage of your total treatments fall into the following categories? *(Please note that percentages must sum to 100%.)*

| Number of Bed Bugs                                      | Percent of Total Treatments |
|---------------------------------------------------------|-----------------------------|
| < 10 bed bugs per infestation (light infestation)       | %                           |
| 11-100 bed bugs per infestation (medium infestation)    | %                           |
| 101-1000 bed bugs per infestation (heavy infestation)   | %                           |
| >1000 bed bugs per infestation (very heavy infestation) | %                           |

25. a) Among your customers, approximately what percent of multi-family dwellings do not allow inspection of surrounding units? *(If not applicable, please leave blank.)*  %

b) Is it your policy to inspect surrounding units (when permitted and possible) within a multi-family dwelling? *(please circle one)*

Yes

No

Don't know

Not applicable

26. Do you feel that your customers are recognizing bed bug infestations earlier now than 6 years ago? *(please circle one)*

Yes

No

Don't know

27. Do you sell retail items (for bed bugs)? *(please circle one)*

Yes

No

28. If you answered Yes to question 27 above, please answer parts (a), (b), and (c) below.

a) What retail products do you offer (for sale or rent)?

|                                                                                                           |                                                                                             |                                                          |
|-----------------------------------------------------------------------------------------------------------|---------------------------------------------------------------------------------------------|----------------------------------------------------------|
| <input type="checkbox"/> Insecticide/chemical spray<br>If so, how many different<br>spray products? _____ | <input type="checkbox"/> Glue boards/sticky traps                                           | <input type="checkbox"/> Steamers                        |
| <input type="checkbox"/> Insecticide/chemical dust<br>If so, how many different<br>dust products? _____   | <input type="checkbox"/> Disposal bags/sheeting for<br>furniture or mattress/box<br>springs | <input type="checkbox"/> Vacuums                         |
| <input type="checkbox"/> Insecticide strips (i.e., Nuvan)                                                 | <input type="checkbox"/> Laundry bags                                                       | <input type="checkbox"/> Inspection kits                 |
| <input type="checkbox"/> Bug bombs                                                                        | <input type="checkbox"/> Mattress/box springs<br>encasements                                | <input type="checkbox"/> Dust applicators                |
| <input type="checkbox"/> Bed bug monitors/traps with<br>chemical lure                                     | <input type="checkbox"/> Mattress/box springs liners                                        | <input type="checkbox"/> Spray bottles                   |
| <input type="checkbox"/> Pitfall-type traps/interceptors                                                  | <input type="checkbox"/> Portable heat chambers                                             | <input type="checkbox"/> Other (please specify)<br>_____ |

b) Of the retail products that you selected above, what is the one item that customers buy most often? You may write it below or simply circle it from the choices above.

c) Do you provide verbal advice on how to best use these products? (please circle one)

Yes

No

29. Please provide any additional comments or suggestions regarding bed bugs that you would like to share, or additional clarification of particular answers in this survey.

---

---

---

Page intentionally left blank

Items 30-32 are optional, but known survey participants will be acknowledged, primarily by company name, in presentations and publications outlining the survey results. If you wish to be publicly acknowledged for your help with the survey, please provide the following information. And, THANK YOU for your help with this important endeavor.

30. Your name (optional) \_\_\_\_\_

31. Your company (optional) \_\_\_\_\_

32. Your email (optional) \_\_\_\_\_

---

**Please use the enclosed envelope to return  
this questionnaire at no cost to you. You  
may also mail the questionnaire to:**

*Statistical Consulting Service  
The Ohio State University  
328 Cockins Hall  
1958 Neil Avenue  
Columbus OH 43210*
